# Supplementary material for: Vaccine Breakthrough Infection with the SARS-CoV-2 Delta or Omicron (BA.1) Variant Leads to Distinct Profiles of Neutralizing Antibody Responses
Source: PubMed Central journal article supplement — medRxiv. 2022 Mar 3:2022.03.02.22271731. Preprint. [Version 1] doi: 10.1101/2022.03.02.22271731 (PMC8902886; doi:10.1101/2022.03.02.22271731), 2022-03-03
Supplement: NIHPP2022.03.02.22271731v1-supplement-1.pdf [file NIHPP2022.03.02.22271731v1-supplement-1.pdf]

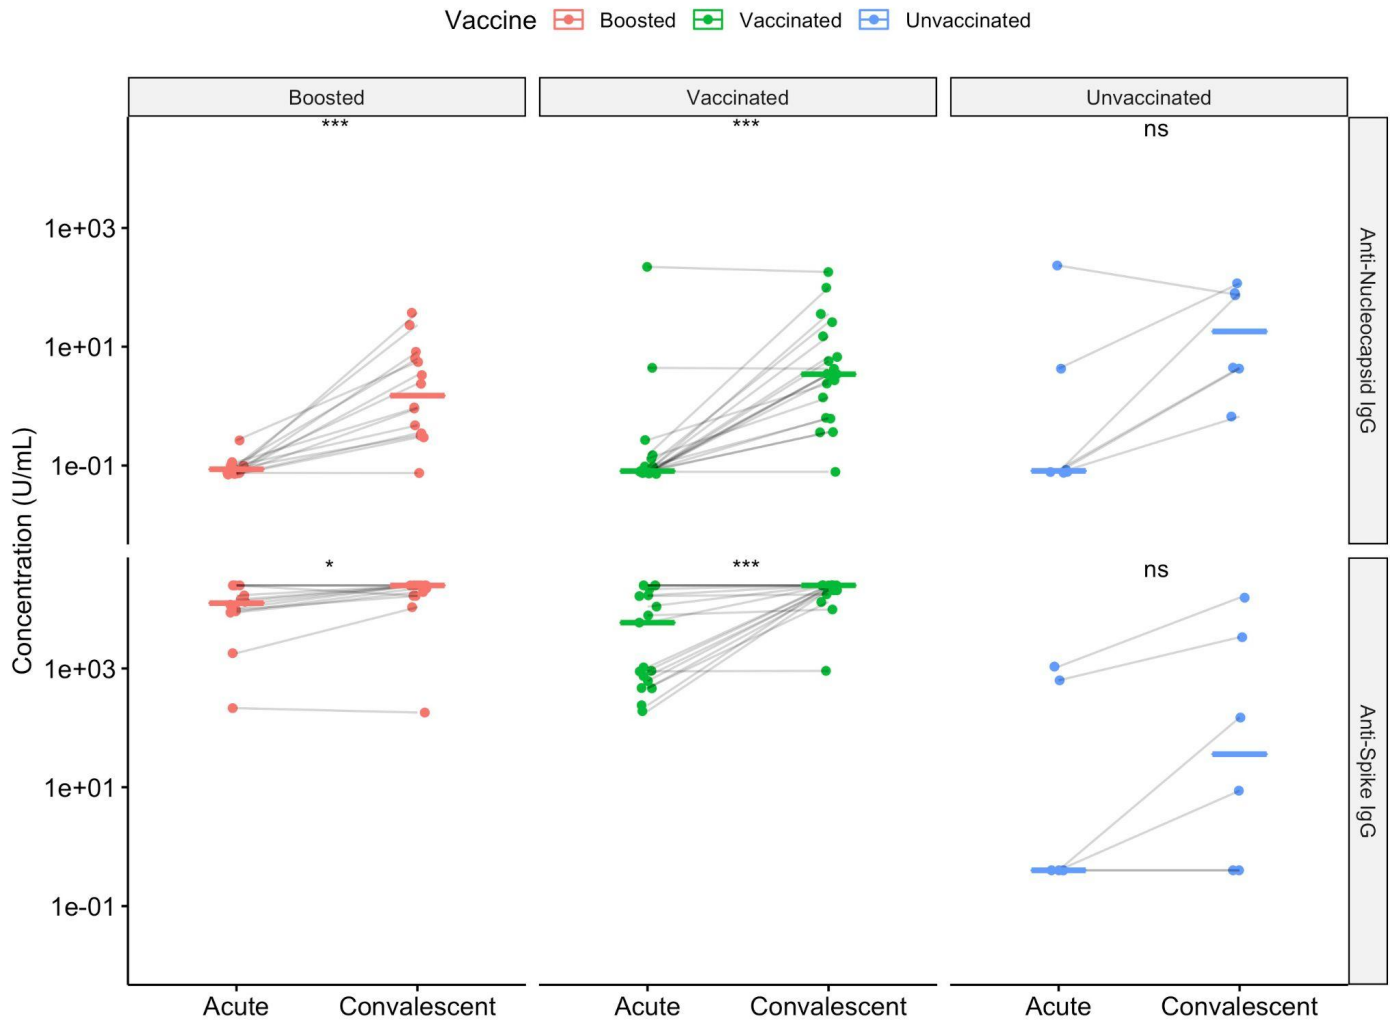

**Figure S1: A.** Antibody titers as measured by ELISA against Spike and Nucleocapsid protein at the time of acute infection and convalescence. Significance from a paired Wilcoxon test is shown. **B.** Antibody titers against Spike and Nucleocapsid protein by vaccination status. Significance from an unpaired Wilcoxon test is shown. ns:  $p > 0.05$ ; \* -  $p < 0.05$ ; \*\*\* -  $p < 0.001$ ; \*\*\*\* -  $p < 0.0001$ .

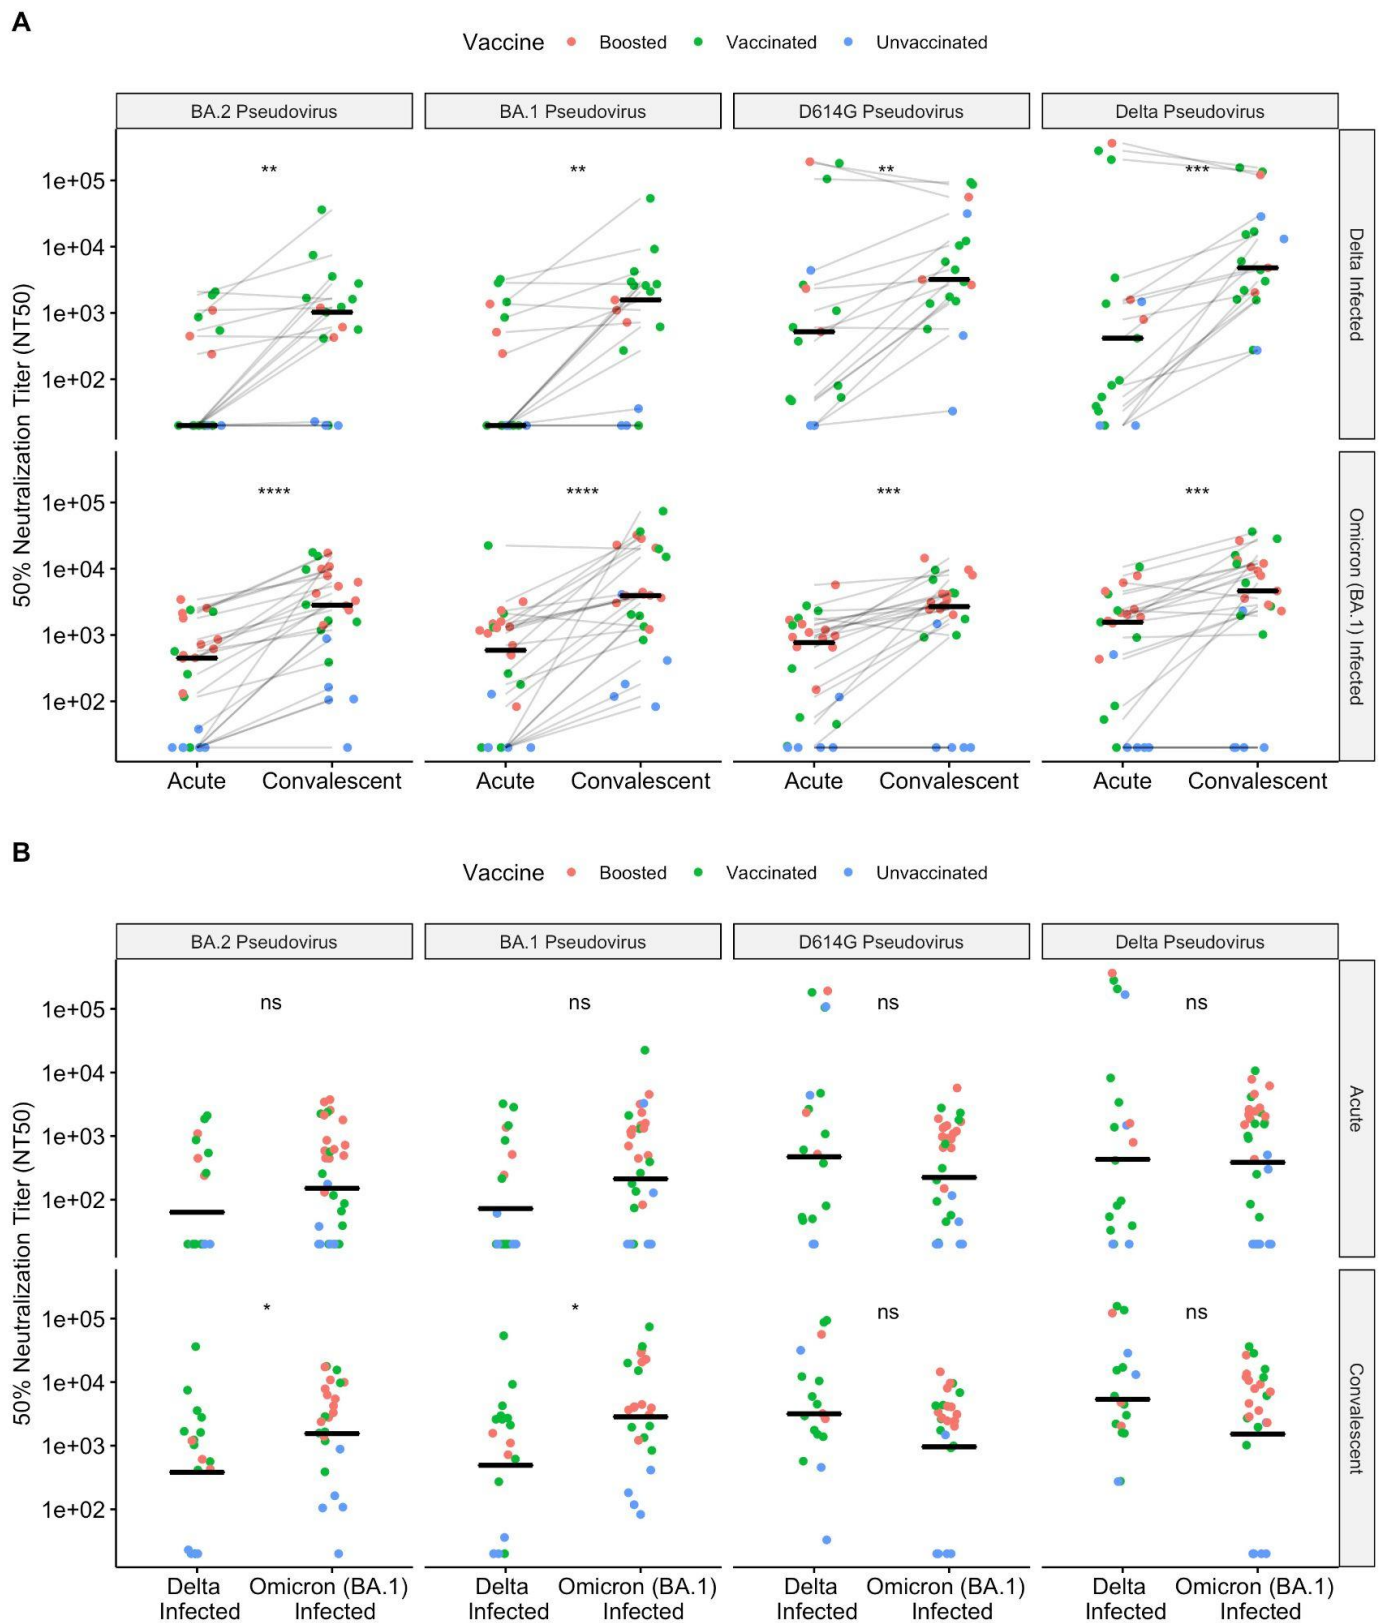

**Figure S2: A.** Neutralizing antibody responses against a panel of pseudoviruses, as measured by the 50% neutralizing antibody titer (NT50), at the time of acute infection and convalescence against a panel of pseudoviruses. Significance from a paired Wilcoxon test is shown. **B.** Neutralizing antibody responses by the infecting variant. Significance from an unpaired Wilcoxon test is shown. ns -  $p > 0.05$ ; \* -  $p < 0.05$ ; \*\* -  $p < 0.01$ ; \*\*\* -  $p < 0.001$ ; \*\*\*\* -  $p < 0.0001$ .

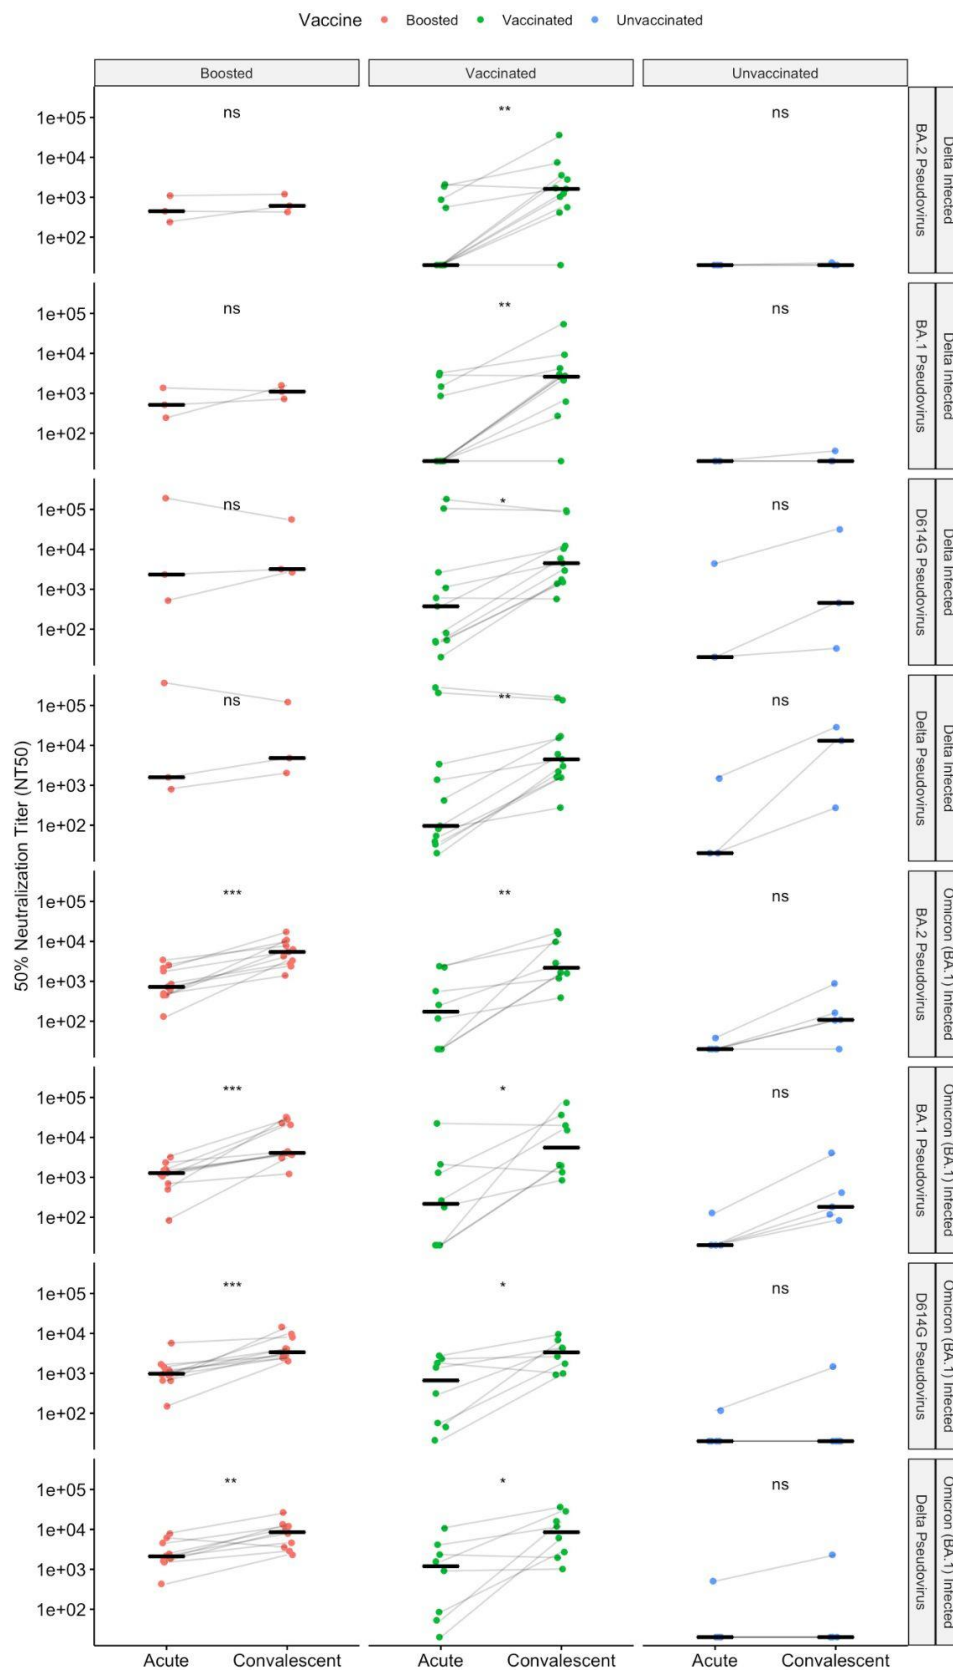

**Figure S3:** Neutralizing antibody responses, as measured by the 50% neutralizing antibody titer (NT50), at the time of acute infection and convalescence against a panel of pseudoviruses. Responses are stratified by the genotype of the infecting variant, the genotype of the pseudovirus, and the vaccination status of the individual. Significance from a paired Wilcoxon test is shown. ns:  $p > 0.05$ ; \* -  $p < 0.05$ ; \*\* -  $p < 0.01$ ; \*\*\* -  $p < 0.001$ .

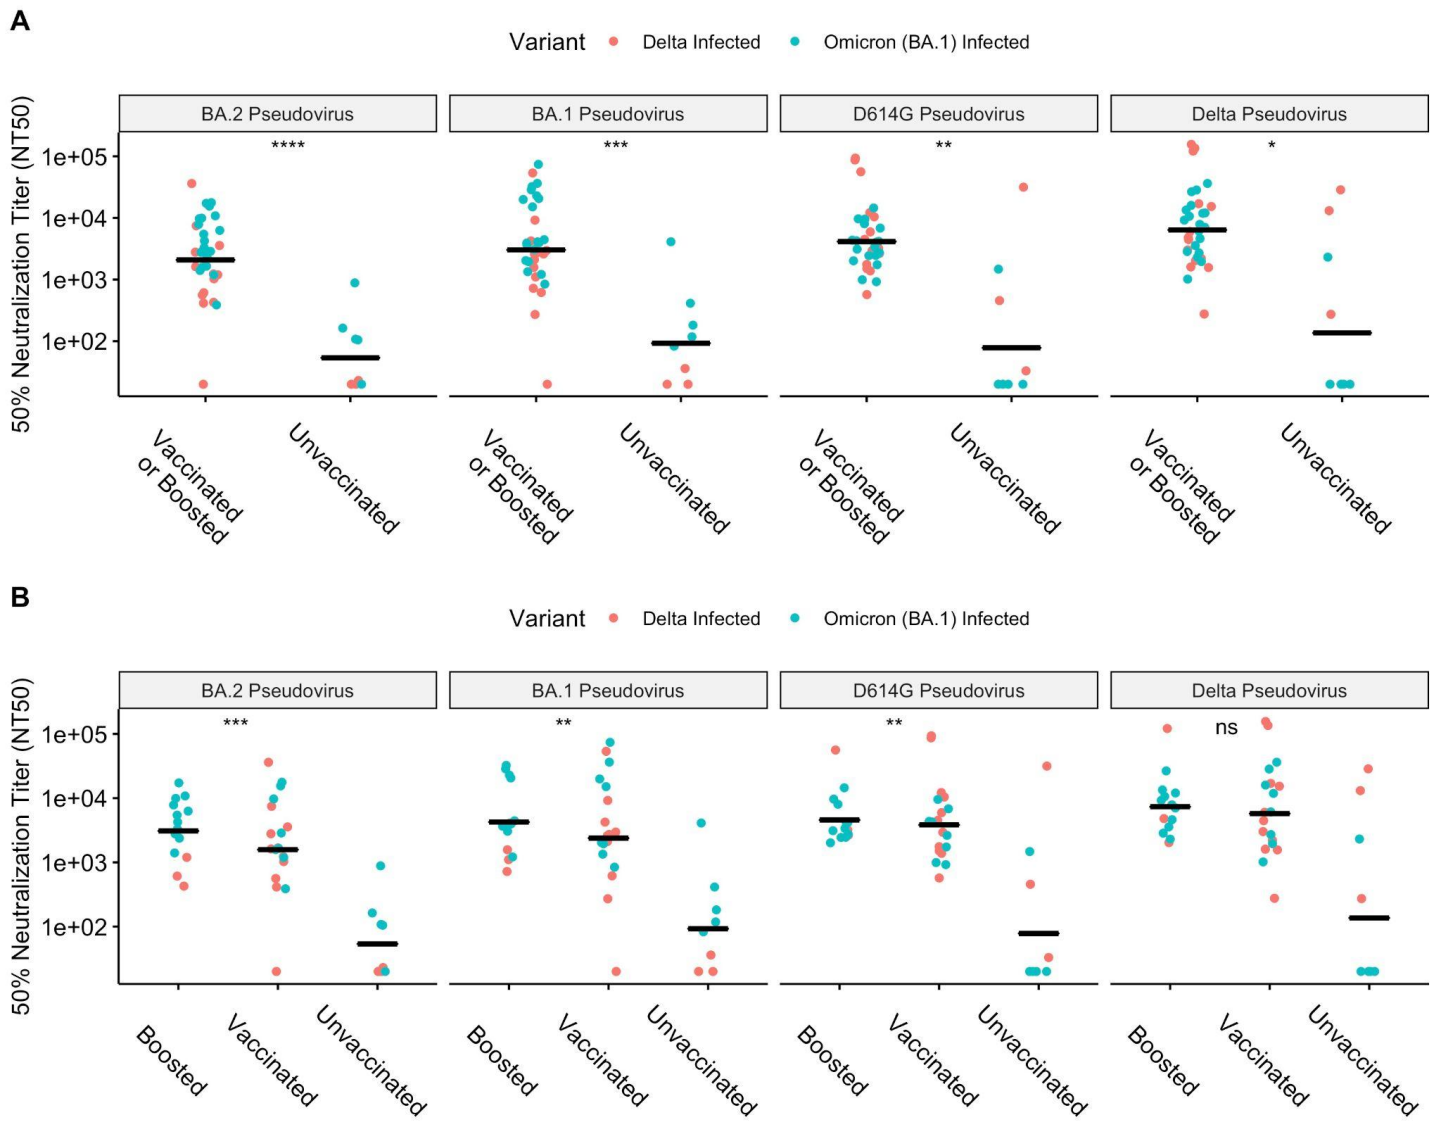

**Figure S4: A.** Neutralizing antibody responses, as measured by the 50% neutralizing antibody titer (NT50), at the time of convalescence, in unvaccinated, vaccinated or boosted individuals, against a panel of pseudoviruses. Significance from a Wilcoxon rank-sum test is shown. **B.** Neutralizing antibody responses, as measured by the 50% neutralizing antibody titer (NT50), at the time of convalescence, in unvaccinated, vaccinated, or boosted individuals, against a panel of pseudoviruses. Significance from a Kruskal-Wallis test is shown. ns:  $p > 0.05$ ; \* -  $p < 0.05$ ; \*\* -  $p < 0.01$ ; \*\*\* -  $p < 0.001$ ; \*\*\*\* -  $p < 0.0001$ .
